# Supplementary material for: Robust repression of tRNA gene transcription during stress requires protein arginine methylation
Source: Life Sci Alliance. 2019 Jun 3;2(3):e201800261. doi: 10.26508/lsa.201800261 (PMC6549136; doi:10.26508/lsa.201800261)
Supplement: Supplementary file 3 [file LSA-2018-00261_TableS1.xlsx]

## Sheet: Strains-S1
Table S1
Strain ID	Name	Genotype	Plasmids	Use
MYY 2899	Rpc82-9Myc	his3∆1 leu2∆0 ura3∆0 rpc31∆::URA RPC82-9Myc::KAN	MYP 643	ChIP
MYY 3104	Rpc82-9myc, Rpc31R5,9A	his3∆1 leu2∆0 ura3∆0 rpc31∆::URA RPC82-9Myc::KAN	MYP 713	ChIP
MYY 2896	Rpc82-9Myc, ∆hmt1	his3∆1 leu2∆0 ura3∆0 rpc31∆::URA RPC82-9Myc::KAN ∆hmt1::NAT	MYP 643	ChIP
MYY 3105	Rpc160-9myc	his3∆1 leu2∆0 ura3∆0 rpc31∆::URA RPC160-9Myc::KAN	MYP 643	ChIP
MYY 3109	Rpc160-9myc, Rpc31R5,9A	his3∆1 leu2∆0 ura3∆0 rpc31∆::URA RPC160-9Myc::KAN	MYP 713	ChIP
MYY 3114	Rpc160-9myc, ∆hmt1	his3∆1 leu2∆0 ura3∆0 rpc31∆::URA RPC160-9Myc::KAN ∆hmt1::NAT	MYP 643	ChIP
MYY 3134	Maf1-9myc	his3∆1 leu2∆0 ura3∆0 rpc31∆::URA Maf1-9Myc::Kan	MYP 643	ChIP
MYY 3119	Maf1-9myc, Rpc31R5,9A	his3∆1 leu2∆0 ura3∆0 rpc31∆::URA Maf1-9Myc::Kan	MYP 713	ChIP
MYY 3136	Maf1-9myc, ∆hmt1	his3∆1 leu2∆0 ura3∆0 rpc31∆::URA Maf1-9Myc::Kan ∆hmt1::NAT	MYP 643	ChIP
MYY 3165	Hmt1-9myc	his3∆1 leu2∆0 met15∆0 ura3∆0 Hmt1 9myc::Kan		ChIP
MYY 3036	Maf1 7SA-13Myc	his3∆1 leu2∆0 ura3∆0 rpc31∆::KAN ∆maf1:Hph	MYP 643, MYP 900	Co-immunoprecipitation assay
MYY 3040	Maf1 7SA-13Myc, Rpc31R5,9A	his3∆1 leu2∆0 ura3∆0 rpc31∆::KAN ∆maf1:Hph	MYP 713, MYP 900	Co-immunoprecipitation assay
MYY 3042	Maf1 7SA-13Myc, ∆hmt1	his3∆1 leu2∆0 ura3∆0 rpc31∆::KAN ∆maf1:Hph ∆hmt1::NAT	MYP 643, MYP 900	Co-immunoprecipitation assay
MYY 1480	WT pGAL-Rpc31	his3∆1 leu2∆0 lys2∆0 ura3∆0 RPC31-mORF	MYP 452	in vitro methylation
MYY 1482	∆hmt1 pGAL-Rpc31	his3∆1 leu2∆0 lys2∆0 ura3∆0 ∆hmt1::HIS RPC31-mORF	MYP 452	in vitro methylation
MYY 2634	Wild-type	his3∆1 leu2∆0 ura3∆0 rpc31∆::KAN	MYP 643	Northern Blotting
MYY 2638	Rpc31R5,9A	his3∆1 leu2∆0 ura3∆0 rpc31∆::KAN	MYP 713	Northern Blotting
MYY 2640	∆hmt1	his3∆1 leu2∆0 ura3∆0 rpc31∆::KAN ∆hmt1::NAT	MYP 643	Northern Blotting

## Sheet: Plasmids-S2
Table S2
MYP #	Name	Parent Vector	Reference
MYP452	GAL-Rpc31		From the Open BioSystems Mobile ORF Collection (55F1)
MYP643	Rpc31 genomic clone	pRS313	This work
MYP713	Rpc31R5,9A	pRS313	This work
MYP716	pGEX-Rpc31	pGEX-4T-1	This work
MYP749	pGEX-Rpc31R5K	pGEX-4T-1	This work
MYP750	pGEX-Rpc31R9K	pGEX-4T-1	This work
MYP751	pGEX-Rpc31R5,9K	pGEX-4T-1	This work
MYP909	Maf1 7SA-13Myc	pRS314	Gift from Ian Willis

## Sheet: Primers-S3
Table S3
MCY Primer ID	Sequence	Description	Use
604	TCTCAAGATTTCGTAGTGATAAA	tY(GUA) intron probe	Northern probe
693	GCTTTGTCTTCCTGTTTAGTCAGGAAG	tP(UGG) intron probe	Northern probe
748	GATATCAGAGATTTTAGAGGTTAAATCCACCT	tL(UAG) intron probe	Northern probe
2617	CCAAACAACCACTTATTTGTTGA	tL(CAA) intron probe	Northern probe
2618	CACCGAATTGACCATGAGGAGACGGTCTGG	U4 snRNA probe	Northern probe
384	GAAAAAGTGGGATTCTGCCTGTGG	No ORF sense	ChIP-qPCR
385	GTTTGCCACAGCGACAGAAGTATAACC	No ORF antisense	ChIP-qPCR
553	TGCATAGACGAGCAGCTTATCCCA	tL(CAA)G2 sense	ChIP-qPCR
554	GCTCGGCCAAACAACCACTTATCT	tL(CAA)G2 antisense	ChIP-qPCR
1052	ATACAATGTGGCTCGGCTACAAATC	tK(CUU)G1 sense	ChIP-qPCR
1053	TGGGACTCTTAGAAGGGAAATAGCTCT	tK(CUU)G1 antisense	ChIP-qPCR
1090	CCAATTTTTGATAAGCCACCCTGA	Tra1 sense	ChIP-qPCR
1091	CGTAATTTCTAAGGTCTTGTTCTCCCA	Tra1 antisense	ChIP-qPCR
1305	CCATCTGACTTTGGCATCAATCCCT	tL(UAG)J sense	ChIP-qPCR
1306	TTAAACCACTCGGCCAAACTCCCA	tL(UAG)J antisense	ChIP-qPCR
2772	GCGTGTGGTCTAGTGGTATG	tP(UGG)A sense	ChIP-qPCR
2773	GGCGAGCTGGGAATTGAA	tP(UGG)A antisense	ChIP-qPCR
2774	CCTGCGTTTCCGTTAAACTATC	5s rDNA (RDN5-1) sense	ChIP-qPCR
2775	GTATGGTCACCCACTACACTAC	5s rDNA (RDN5-1) antisense	ChIP-qPCR
2776	GAGATACAACACCTCGCAAGAA	tY(GUA)D sense	ChIP-qPCR
2777	ACGCCCGATCTCAAGATTTC	tY(GUA)D antisense	ChIP-qPCR
2799	CCAATGTATACAACTAACCGATATCCA	tV(UAC)B sense	ChIP-qPCR
2800	AGGTTCGAACTCGGGATCTT	tV(UAC)B antisense	ChIP-qPCR
2801	GATAGCAAGTACAAGAGAGTACTACAG	tK(UUU)G2 sense	ChIP-qPCR
2802	CCCTGACATTTCGGTATCCTT	tK(UUU)G2 antisense	ChIP-qPCR
2803	TAGCTCGCGTGGCGTAAT	tR(UCU)D sense	ChIP-qPCR
2804	GCGCCCATTCTGACCATTAAA	tR(UCU)D antisense	ChIP-qPCR
2805	GTTCACATAATTGAGTTAGAGCTTG	tT(AGU)D sense	ChIP-qPCR
2806	GAACCGATGATCTCCACATTAC	tT(AGU)D antisense	ChIP-qPCR
1379	CCGAACAAACATGAGTTCTTATAAGGGCGGCAGTAG	RPC31R5K sense	Cloning
1380	CTACTGCCGCCCTTATAAGAACTCATGTTTGTTCGG	RPC31R5K antisense	Cloning
1371	AGGGGCGGCAGTAAAGGTGGCGGG	RPC31R9K sense	Cloning
1372	CCCGCCACCTTTACTGCCGCCCCT	RPC31R9K antisense	Cloning
1377	CCGAACAAACATGAGTTCTTATAAGGGCGGCAGTAAAGGTGGCGGG	RPC31R5,9K sense	Cloning
1378	CCCGCCACCTTTACTGCCGCCCTTATAAGAACTCATGTTTGTTCGG	RPC31R5,9K antisense	Cloning
1375	CCCGAACAAACATGAGTTCTTATGCTGGCGGCAGTGCAGGTGGCGGGAG	RPC31R5,9A sense	Cloning
1376	CTCCCGCCACCTGCACTGCCGCCAGCATAAGAACTCATGTTTGTTCGGG	RPC31R5,9A antisense	Cloning
